# Supplementary material
Source: HighWire-hosted journal article supplement (https://bmjopen.bmj.com/content/12/5/e054158)
Supplement: inline-supplementary-material-1 [file inline-supplementary-material-1.pdf]

## Supplementary Material: Sample Search Strategy

February 24, 2022

### Supplementary 1: MEDLINE search strategy

| #   | Searches                                                                                                                                                                                                                                                                                                                                                                                                                                                                                                                                        |
|-----|-------------------------------------------------------------------------------------------------------------------------------------------------------------------------------------------------------------------------------------------------------------------------------------------------------------------------------------------------------------------------------------------------------------------------------------------------------------------------------------------------------------------------------------------------|
| 1.  | Osteoporosis/                                                                                                                                                                                                                                                                                                                                                                                                                                                                                                                                   |
| 2.  | (“Osteoporoses or “Osteoporosis, Senile” or “Senile Osteoporoses” or “Osteoporoses, Senile” or “Senile Osteoporoses” or “Senile Osteoporosis” or “Osteoporosis, Involutional”).mp.                                                                                                                                                                                                                                                                                                                                                              |
| 3.  | (“Osteoporosis, Age-Related” or “Osteoporosis, Age Related” or “Bone Loss, Age-Related” or “Age-Related Bone Loss” or “Age-Related Bone Losses” or “Bone Loss, Age Related” ).mp.                                                                                                                                                                                                                                                                                                                                                               |
| 4.  | (“Bone Losses, Age-Related” or “Age-Related Osteoporosis” or “Age Related Osteoporosis” or “Age-Related Osteoporoses” or “Osteoporoses, Age-Related” ).mp.                                                                                                                                                                                                                                                                                                                                                                                      |
| 5.  | Postmenopausal Osteoporosis/                                                                                                                                                                                                                                                                                                                                                                                                                                                                                                                    |
| 6.  | (“Perimenopausal Bone Loss” or “Bone Loss, Postmenopausal” or “Bone Losses, Postmenopausal” or “Postmenopausal Bone Losses” or “Osteoporosis, Post-Menopausal” or Osteoporoses, Post-Menopausal” or “Osteoporosis, Post Menopausal” or “Post-Menopausal Osteoporoses” or “Post-Menopausal Osteoporosis” or “Postmenopausal Osteoporosis” or “Osteoporoses, Postmenopausal” or “Postmenopausal Osteoporoses” or “Bone Loss, Perimenopausal” or “Bone Losses, Perimenopausal” or “Perimenopausal Bone Losses” or “Postmenopausal Bone Loss” ).mp. |
| 7.  | or /1-6                                                                                                                                                                                                                                                                                                                                                                                                                                                                                                                                         |
| 8.  | Hydroxymethylglutaryl CoA Reductase Inhibitors/                                                                                                                                                                                                                                                                                                                                                                                                                                                                                                 |
| 9.  | (“Inhibitors, Hydroxymethylglutaryl-CoA Reductase” or “Reductase Inhibitors, Hydroxymethylglutaryl-CoA” or “HMG-CoA Reductase Inhibitor” or “HMG CoA Reductase Inhibitor”).mp.                                                                                                                                                                                                                                                                                                                                                                  |
| 10. | 8 or 9                                                                                                                                                                                                                                                                                                                                                                                                                                                                                                                                          |
| 11. | Statin/                                                                                                                                                                                                                                                                                                                                                                                                                                                                                                                                         |
| 12. | (“Statins” or “Statins, HMG-CoA” or “HMG-CoA Statins” or “Statins, HMG CoA”).mp.                                                                                                                                                                                                                                                                                                                                                                                                                                                                |
| 13. | (“Inhibitors, HMG-CoA Reductase” or “Inhibitors, HMG CoA Reductase” or “Reductase Inhibitors, HMG-CoA” or “HMG-CoA Reductase Inhibitors” or “HMG                                                                                                                                                                                                                                                                                                                                                                                                |

|     |                                                                                                                                                                                                                                                                                                                                                                                                                                                                                                                                                                                                                                                                                                                     |
|-----|---------------------------------------------------------------------------------------------------------------------------------------------------------------------------------------------------------------------------------------------------------------------------------------------------------------------------------------------------------------------------------------------------------------------------------------------------------------------------------------------------------------------------------------------------------------------------------------------------------------------------------------------------------------------------------------------------------------------|
|     | CoA Reductase Inhibitors” or “Inhibitors, Hydroxymethylglutaryl-Coenzyme A” or “Hydroxymethylglutaryl-Coenzyme A Inhibitors” or “Inhibitors, Hydroxymethylglutaryl Coenzyme A” or “Inhibitors, Hydroxymethylglutaryl-CoA” or “Hydroxymethylglutaryl-CoA Inhibitors” or “Inhibitors, Hydroxymethylglutaryl CoA” or “Hydroxymethylglutaryl-CoA Reductase Inhibitor” or “Hydroxymethylglutaryl CoA Reductase Inhibitor” or “Reductase Inhibitor, Hydroxymethylglutaryl-CoA” ).mp.                                                                                                                                                                                                                                      |
| 14. | or/11-13                                                                                                                                                                                                                                                                                                                                                                                                                                                                                                                                                                                                                                                                                                            |
| 15. | Lovastatin/                                                                                                                                                                                                                                                                                                                                                                                                                                                                                                                                                                                                                                                                                                         |
| 16. | (“Mevinolin” or “Monacolin K” or “6-Methylcompactin” or “6 Methylcompactin” or “MK-803” or “MK 803” or “MK803” or “Mevacor” or “Lovastatin, (1 alpha(S*))-Isomer” or “Lovastatin, 1 alpha-Isomer” or “1 alpha-Isomer Lovastatin” or “Lovastatin, 1 alpha Isomer” or “alpha-Isomer Lovastatin, 1” ).mp.                                                                                                                                                                                                                                                                                                                                                                                                              |
| 17. | 15 or 16                                                                                                                                                                                                                                                                                                                                                                                                                                                                                                                                                                                                                                                                                                            |
| 18. | Pravastatin/                                                                                                                                                                                                                                                                                                                                                                                                                                                                                                                                                                                                                                                                                                        |
| 19. | (“Eptastatin” or “Vasten” or “CS-514” or “CS 514” or “CS514” or “Lin-Pravastatin” or “Lin Pravastatin” or “Lipemol” or “Liplat” or “Nu-Pravastatin” or “Nu Pravastatin” or “Prareduct” or “Pravachol” or “Elisor” or “Selektine” or “Lipostat” or “Pravacol” or “Pravasin” or “Pravastatin Monosodium Salt, (6 beta)-Isomer” or “Pravastatin Sodium” or “Pravastatin Sodium Salt” or “Sodium Salt, Pravastatin” or “Pravastatin tert-Octylamine Salt” or “Pravastatin tert Octylamine Salt” or “Pravastatin, (6 beta)-Isomer” or “RMS-431” or “RMS 431” or “RMS431” or “SQ-31000” or “SQ 31000” or “SQ31000” or “SQ-31,000” or “SQ 31,000” or “SQ31,000” Apo-Pravastatin” or “Apo Pravastatin” or “Bristacol” ).mp. |
| 20. | 18 or 19                                                                                                                                                                                                                                                                                                                                                                                                                                                                                                                                                                                                                                                                                                            |
| 21. | Simvastatin/                                                                                                                                                                                                                                                                                                                                                                                                                                                                                                                                                                                                                                                                                                        |
| 22. | (“Zocor” or “MK-733” or “MK 733” or “MK733” or “Synvinolin” ).mp.                                                                                                                                                                                                                                                                                                                                                                                                                                                                                                                                                                                                                                                   |
| 23. | 21 or 22                                                                                                                                                                                                                                                                                                                                                                                                                                                                                                                                                                                                                                                                                                            |
| 24. | Fluvastatin /                                                                                                                                                                                                                                                                                                                                                                                                                                                                                                                                                                                                                                                                                                       |
| 25. | (“Fluvastatin Sodium” or “Fluvastatin Sodium Salt” or “Fluindostatin” or “Lescol” or “XU 62-320” or “XU 62 320” or “XU-62320” or “XU62320” or “XU 62320” or “7-(3-(4-Fluorophenyl)-1-(1-methylethyl)-1H-indol-2-yl)-3,5-dihydroxy-6-heptenoate” ).mp.                                                                                                                                                                                                                                                                                                                                                                                                                                                               |
| 26. | 24 or 25                                                                                                                                                                                                                                                                                                                                                                                                                                                                                                                                                                                                                                                                                                            |

|     |                                                                                                                                                                                                                                                                                                                                                                 |
|-----|-----------------------------------------------------------------------------------------------------------------------------------------------------------------------------------------------------------------------------------------------------------------------------------------------------------------------------------------------------------------|
| 27. | Atorvastatin/                                                                                                                                                                                                                                                                                                                                                   |
| 28. | (“(3R,5R)-7-(2-(4-Fluorophenyl)-5-isopropyl-3-phenyl-4-(phenylcarbamoyl)-1H-pyrrol-1-yl)-3,5-dihydroxyheptanoic acid” or “Atorvastatin Calcium” or “Atorvastatin, Calcium Salt” or “Liptonorm” or “Lipitor” or “Atorvastatin Calcium Hydrate” or “Atorvastatin Calcium Anhydrous” or “CI 981” or “CI-981” or “CI981” or “Atorvastatin Calcium Trihydrate” ).mp. |
| 29. | 27 or 28                                                                                                                                                                                                                                                                                                                                                        |
| 30. | Rosuvastatin Calcium /                                                                                                                                                                                                                                                                                                                                          |
| 31. | (“Calcium, Rosuvastatin” or “Crestor” or “Rosuvastatin” or “ZD4522” or “ZD 4522” ).mp.                                                                                                                                                                                                                                                                          |
| 32. | 30 or 31                                                                                                                                                                                                                                                                                                                                                        |
| 33. | Pitavastatin/                                                                                                                                                                                                                                                                                                                                                   |
| 34. | (“itavastatin” or “(E,3R,5S)-7-(2-cyclopropyl-4-(4-fluorophenyl)quinolin-3-yl)-3,5-dihydroxyhept-6-enoic acid” or “P 872441” or “P-872441” or “NK 104” or “NK-104” or “pitavastatin calcium” or “itavastatin calcium” or “pitavastatin lactone” or “nisvastatin” ).mp.                                                                                          |
| 35. | 33 or 34                                                                                                                                                                                                                                                                                                                                                        |
| 36. | 10 or 14 or 17 or 20 or 23 or 26 or 29 or 32 or 35                                                                                                                                                                                                                                                                                                              |
| 37. | Placebo/                                                                                                                                                                                                                                                                                                                                                        |
| 38. | 36 or 37                                                                                                                                                                                                                                                                                                                                                        |
| 39. | Fracture/                                                                                                                                                                                                                                                                                                                                                       |
| 40. | (“Bone Densities” or “Density, Bone” or “Bone Mineral Density” or “Bone Mineral Densities” or “Density, Bone Mineral” or Bone Mineral Content” or “Bone Mineral Contents” ).mp.                                                                                                                                                                                 |
| 41. | adverse events/                                                                                                                                                                                                                                                                                                                                                 |
| 42. | Bone turnover marker/                                                                                                                                                                                                                                                                                                                                           |
| 43. | N-terminal propeptide of type I procollagen/                                                                                                                                                                                                                                                                                                                    |
| 44. | (“P-I-P peptide” or “Type I procollagen N-terminal peptide” or “PINP peptide” or “amino terminal propeptide of type I collagen” or “PINP peptide” or “fetal antigen 2, human” or “foetal antigen 2, human” or “FA2 antigen, human” or “aminoterminal propeptide of type I collagen, human” or “collagen type I, amino-propeptide, human” ).mp.                  |
| 45. | C terminal telopeptide of type I collagen                                                                                                                                                                                                                                                                                                                       |

|     |                                                                                                                                                                                                                                                                                                                                                                                                                                                                                                                                                                         |
|-----|-------------------------------------------------------------------------------------------------------------------------------------------------------------------------------------------------------------------------------------------------------------------------------------------------------------------------------------------------------------------------------------------------------------------------------------------------------------------------------------------------------------------------------------------------------------------------|
| 46. | ("trimeric cross-linked peptide collagen type I" or "C-terminal type I collagen telopeptide" or "CTCLP" or "CTx telopeptide" or "serum carboxyterminal telopeptide type I collagen" or "ICTP peptide" or "C-terminal telopeptide of type I collagen" or "COOH-terminal telopeptide of type I collagen" or "C-terminal cross-linking telopeptide, collagen type I" or "N-telopeptide" or "N-terminal type I collagen telopeptide" or "NTx telopeptide" or "pyridinoline cross-linked carboxy-terminal telopeptide, collagen type I" or "C-telopeptide" or "i-ICTP" ).mp. |
| 47. | cross-linked N-telopeptide of type I collagen                                                                                                                                                                                                                                                                                                                                                                                                                                                                                                                           |
| 48. | ("trimeric cross-linked peptide collagen type I" or "C-terminal type I collagen telopeptide" or "CTCLP" or "CTx telopeptide" or "serum carboxyterminal telopeptide type I collagen" or "ICTP peptide" or "C-terminal telopeptide of type I collagen" or "COOH-terminal telopeptide of type I collagen" or "C-terminal cross-linking telopeptide, collagen type I" or "N-telopeptide" or "N-terminal type I collagen telopeptide" or "NTx telopeptide" or "pyridinoline cross-linked carboxy-terminal telopeptide, collagen type I" or "C-telopeptide" or "i-ICTP" ).mp. |
| 49. | alkaline phosphatase/                                                                                                                                                                                                                                                                                                                                                                                                                                                                                                                                                   |
| 50. | or/39-49                                                                                                                                                                                                                                                                                                                                                                                                                                                                                                                                                                |
| 51. | randomized controlled trial                                                                                                                                                                                                                                                                                                                                                                                                                                                                                                                                             |
| 52. | 7 and 36 and 50 and 51                                                                                                                                                                                                                                                                                                                                                                                                                                                                                                                                                  |

### Supplementary 2: CBM search strategy

| #  | Searches                                                                                                                                                                    |
|----|-----------------------------------------------------------------------------------------------------------------------------------------------------------------------------|
| 1. | "骨质疏松"[不加权:扩展] OR "骨质疏松, 绝经后"[不加权:扩展] OR "骨质疏松, 绝经后"[不加权:扩展] OR "骨质疏松"[不加权:扩展] OR "骨质疏松"[不加权:扩展] OR "骨质疏松"[不加权:扩展] OR "骨质疏松性骨折"[不加权:扩展] OR "骨质疏松"[不加权:扩展] OR "骨质疏松"[不加权:扩展] |
| 2. | "羟甲基戊二酰基 CoA 还原酶抑制剂"[不加权:扩展]                                                                                                                                                |
| 3. | "阿托伐他汀钙"[不加权:扩展] OR "阿托伐他汀钙"[不加权:扩展] OR "阿托伐他汀钙"[不加权:扩展] OR "阿托伐他汀钙"[不加权:扩展] OR "阿托伐他汀钙"[不加权:扩展] OR "阿托伐他汀钙"[不加权:扩展]                                                        |
| 4. | "瑞舒伐他汀钙"[不加权:扩展]                                                                                                                                                            |
| 5. | "匹伐他汀钙"[不加权:扩展]                                                                                                                                                             |
| 6. | "洛伐他汀钙"[不加权:扩展]                                                                                                                                                             |

|     |                                                                                                                                                                                                                                                                                                                                                                                              |
|-----|----------------------------------------------------------------------------------------------------------------------------------------------------------------------------------------------------------------------------------------------------------------------------------------------------------------------------------------------------------------------------------------------|
| 7.  | “辛伐他汀钙”[不加权:扩展]                                                                                                                                                                                                                                                                                                                                                                              |
| 8.  | “氟伐他汀钙”[不加权:扩展]                                                                                                                                                                                                                                                                                                                                                                              |
| 9.  | 安慰剂对照                                                                                                                                                                                                                                                                                                                                                                                        |
| 10. | OR/2-9                                                                                                                                                                                                                                                                                                                                                                                       |
| 11. | "骨折"[不加权:扩展] OR "骨折"[不加权:扩展] OR "骨折"[不加权:扩展] OR "脊柱骨折"[不加权:扩展] OR "胫骨骨折"[不加权:扩展] OR "胫骨骨折"[不加权:扩展] OR "Monteggia 骨折"[不加权:扩展] OR "Colles 骨折"[不加权:扩展] OR "Bankart 损伤"[不加权:扩展] OR "踝骨折"[不加权:扩展] OR "骨折, 应力性"[不加权:扩展] OR "骨折, 应力性"[不加权:扩展] OR "肩骨折"[不加权:扩展] OR "眶骨折"[不加权:扩展] OR "颌骨折"[不加权:扩展] OR "髌骨折"[不加权:扩展] OR "脊柱骨折"[不加权:扩展] OR "胫骨骨折"[不加权:扩展] OR "Salter-Harris 骨折"[不加权:扩展] OR "骨折"[不加权:扩展] |
| 12. | 骨转换标志物                                                                                                                                                                                                                                                                                                                                                                                       |
| 13. | “I 型前胶原的 N 端前肽”                                                                                                                                                                                                                                                                                                                                                                              |
| 14. | PINP                                                                                                                                                                                                                                                                                                                                                                                         |
| 15. | I 型胶原的 C 端端肽                                                                                                                                                                                                                                                                                                                                                                                 |
| 16. | CTX                                                                                                                                                                                                                                                                                                                                                                                          |
| 17. | I 型胶原的交联 N 端肽                                                                                                                                                                                                                                                                                                                                                                                |
| 18. | NTX                                                                                                                                                                                                                                                                                                                                                                                          |
| 19. | 碱性磷酸酶                                                                                                                                                                                                                                                                                                                                                                                        |
| 20. | ALP                                                                                                                                                                                                                                                                                                                                                                                          |
| 21. | OR/11-20                                                                                                                                                                                                                                                                                                                                                                                     |
| 22. | "随机对照试验"[不加权:扩展]                                                                                                                                                                                                                                                                                                                                                                             |
| 23. | 1 AND 10 AND 21                                                                                                                                                                                                                                                                                                                                                                              |
